# Supplementary material
Source: PubMed Central journal article supplement (PMC9354177)
Supplement: sj-pdf-1-ult-10.1177_1742271X211047945.pdf [file sj-pdf-1-ult-10.1177_1742271X211047945.pdf]

## Appendix

### Appendix 1

| Age | LUS Score | CEUS findings | CXR findings                            | CT score | CT PA | CRP      | Ferritin | D-Dimer | Lymphocyte count | Troponin |     |     |
|-----|-----------|---------------|-----------------------------------------|----------|-------|----------|----------|---------|------------------|----------|-----|-----|
| 67  | 28        | Severe        | Avascular                               | Atypical | 40    | Moderate | Negative | 214     | 2654             | 9811     | 0.4 | 47  |
|     | 26        | Severe        | Avascular                               | Typical  | 100   | Severe   | -        | 93      | 1283             | 8682     | 0.7 | 33  |
| 73  | 28        | Severe        | Avascular                               | Typical  | 50    | Moderate | Negative | 14      | 279              | 2000     | 1.5 | 54  |
| 59  | 14        | Moderate      | Avascular                               | Typical  | 70    | Severe   | Negative | 97      | 1941             | 4185     | 0.4 | 20  |
| 47  | 27        | Severe        | Avascular                               | Typical  | 80    | Severe   | Negative | 80      | 591              | 3507     | 1.4 | 14  |
| 57  | 24        | Severe        | Avascular                               | Typical  | 70    | Severe   | Negative | 150     | 291              | 6683     | 3.1 | 55  |
| 61  | 27        | Severe        | Avascular                               | Typical  | 90    | Severe   | Positive | 64      | 2080             | 10927    | 0.5 | 76  |
|     | 20        | Moderate      | Avascular                               | Typical  | 80    | Severe   | Negative | 141     | 1863             | 5447     | 0.9 | 50  |
| 61  | 28        | Severe        | Avascular                               | Typical  | -     | -        | -        | 73      | 2178             | 4456     | 0.6 | 115 |
|     | 30        | Severe        | Avascular                               | Typical  | 90    | Severe   | Negative | 225     | 1632             | 2672     | 1.9 | 31  |
| 75  | 14        | Moderate      | Avascular                               | Atypical | 10    | Mild     | Negative | 105     | 475              | 593      | 1.8 | 16  |
| 35  | 20        | Moderate      | Avascular                               | Typical  | 90    | Severe   | Negative | 35      | 790              | 2395     | 1.4 | 145 |
| 52  | 18        | Moderate      | Avascular                               | Normal   | 20    | Mild     | Negative | 349     | 881              | 5951     | 0.4 | 27  |
|     | 12        | Moderate      | Not done (no SPC)                       | Normal   | -     | -        | -        | 50      | -                | -        | 1.5 | -   |
| 84  | 22        | Severe        | Avascular                               | Typical  | 50    | Moderate | Positive | 102     | 2630             | >80000   | 1.5 | 26  |
| 70  | 23        | Severe        | Avascular                               | Typical  | 70    | Severe   | Negative | 110     | 2977             | 2566     | 1.4 | 34  |
|     | 18        | Moderate      | Not done (no SPC)                       | -        | -     | -        | -        | 10      | -                | -        | 3.7 | -   |
| 67  | 22        | Severe        | Avascular                               | Typical  | 70    | Severe   | Negative | 204     | 1291             | 2610     | 1.0 | 14  |
|     | 15        | Moderate      | Delayed enhancement                     | -        | -     | -        | -        | 9       | 1098             | 2100     | 2.3 | 13  |
| 77  | 24        | Severe        | Avascular (one area minimally vascular) | Typical  | 60    | Moderate | Positive | 132     | 13               | -        | 1.7 | 13  |

Appendix 1: A summary of our findings, comparing LUS scores, CT scores, CTPA results, CXR findings and inflammatory markers.

## Appendix 2:

| Age | Imaging   |               |                     |             |          |                     | Clinical markers |          |         |                  |          |     |
|-----|-----------|---------------|---------------------|-------------|----------|---------------------|------------------|----------|---------|------------------|----------|-----|
|     | LUS score | CEUS findings | CXR findings        | CT findings | PE       | Oxygen requirements | CRP              | Ferritin | D-Dimer | Lymphocyte count | Troponin |     |
| 67  | 28        | Severe        | Avascular           | Atypical    | Moderate | Negative            | CPAP             | 214      | 2654    | 9811             | 0.4      | 47  |
|     | 26        | Severe        | Avascular           | Typical     | Severe   | -                   | 0.45 / 15 PSV    | 93       | 1283    | 8682             | 0.7      | 33  |
| 61  | 20        | Moderate      | Avascular           | Typical     | Severe   | Negative            | CPAP             | 141      | 1863    | 5447             | 0.9      | 50  |
|     | 28        | Severe        | Avascular           | Typical     | -        | -                   | 0.75 / 12 PSV    | 73       | 2178    | 4456             | 0.6      | 115 |
|     | 30        | Severe        | Avascular           | Typical     | Severe   | Negative            | 0.55 APRV        | 225      | 1632    | 2627             | 1.9      | 31  |
| 52  | 18        | Moderate      | Avascular           | Normal      | Mild     | Negative            | 31 via NC        | 349      | 881     | 5951             | 0.4      | 27  |
|     | 12        | Moderate      | Not done (no SPC)   | Normal      | -        | -                   | SV               | 50       | -       | -                | 1.5      | -   |
| 70  | 23        | Severe        | Avascular           | Typical     | Severe   | Negative            | CPAP             | 110      | 2977    | 2566             | 1.4      | 34  |
|     | 18        | Moderate      | Not done (no SPC)   | -           | -        | -                   | SV               | 10       | -       | -                | 3.7      | -   |
| 67  | 22        | Severe        | Avascular           | Typical     | Severe   | Negative            | CPAP             | 204      | 1291    | 2610             | 1.0      | 14  |
|     | 15        | Moderate      | Delayed enhancement | -           | -        | -                   | CPAP             | 9        | 1098    | 2100             | 2.3      | 13  |

Appendix 2: A closer look at our findings on follow up, comparing LUS scores, CT scores, CTPA results, CXR findings and inflammatory markers. The oxygen requirements have also been included as a useful clinical indicator.
